# Supplementary material
Source: MDPI journal article supplement (https://www.mdpi.com/2079-6412/13/10/1681)
Supplement: s1 [file s1]

# Supplementary materials

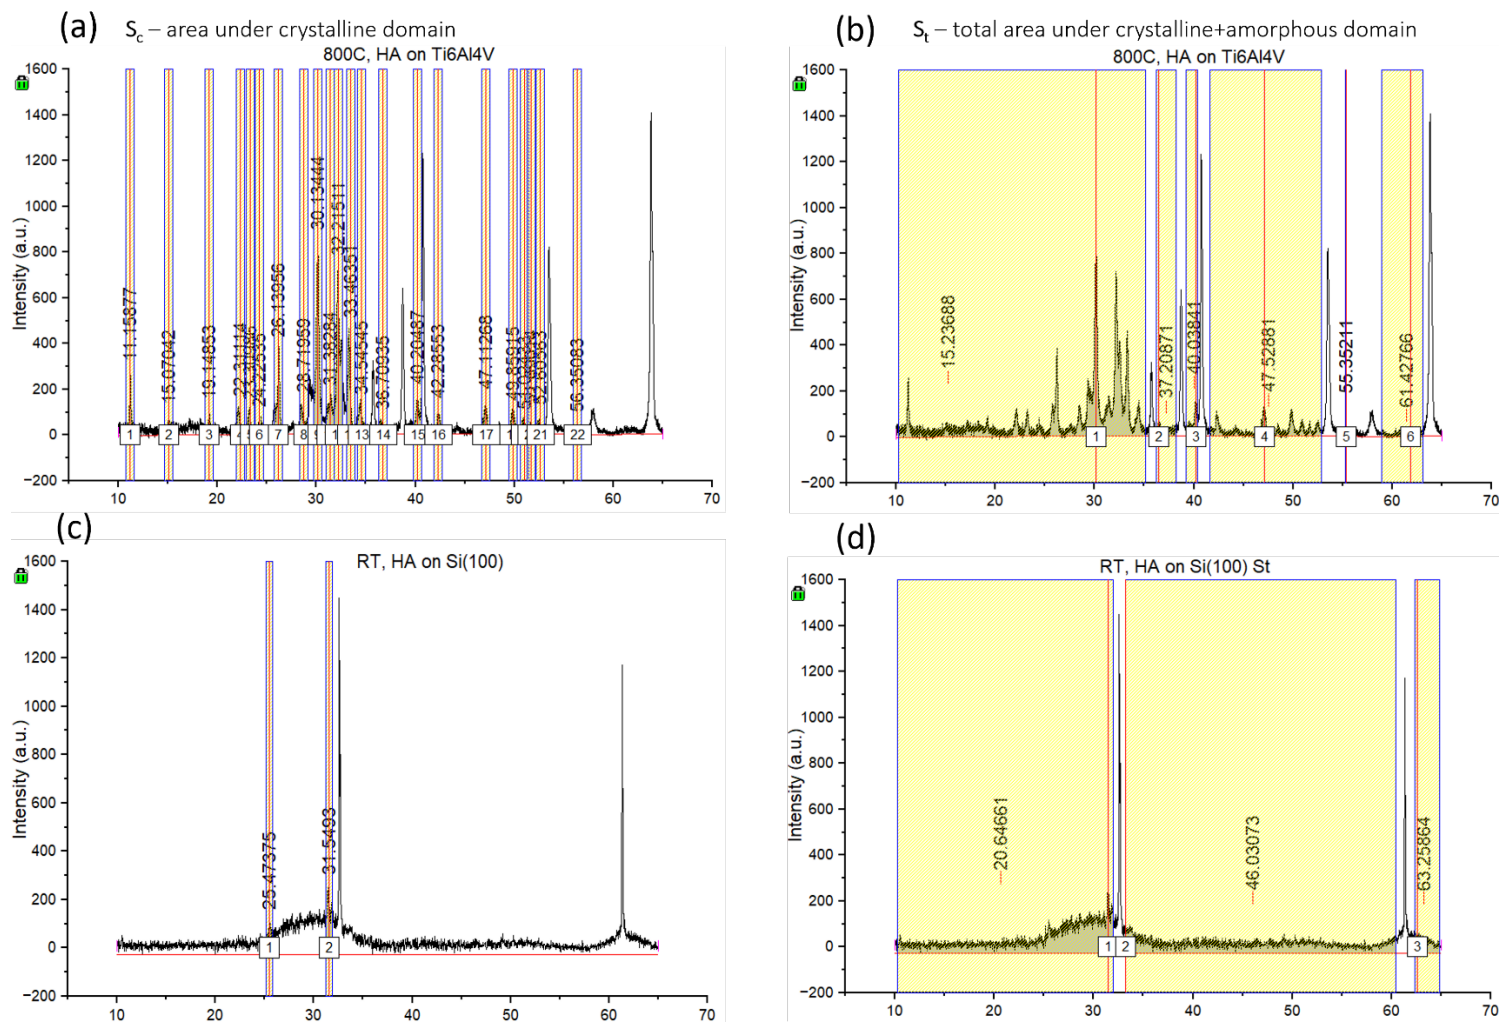

**Figure S1.** Representative calculations of crystallinity indices for (a-b) HA on Ti6Al4V at 800C and (c-d) HA on Si(100) at deposited RT. Crystallinity index:  $CI(\%) = (S_c/S_t) \cdot 100\%$ .

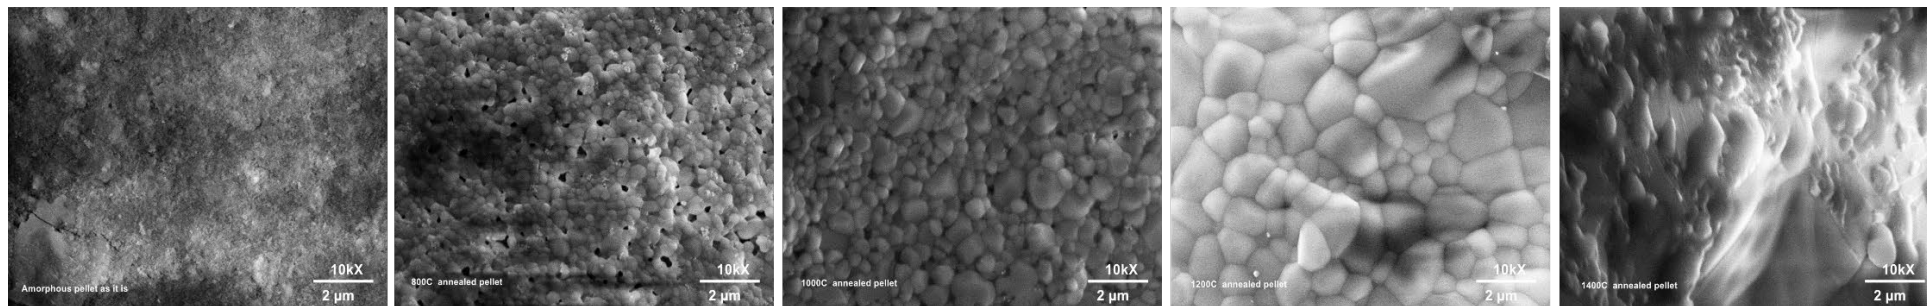

**Figure S2.** SEM images of the HA pellets cold-pressed at 5000 psi, then annealed at different temperatures: (a) amorphous, (b) 800°C, (c) 1000°C, (d) 1200°C, and (e) 1400°C.

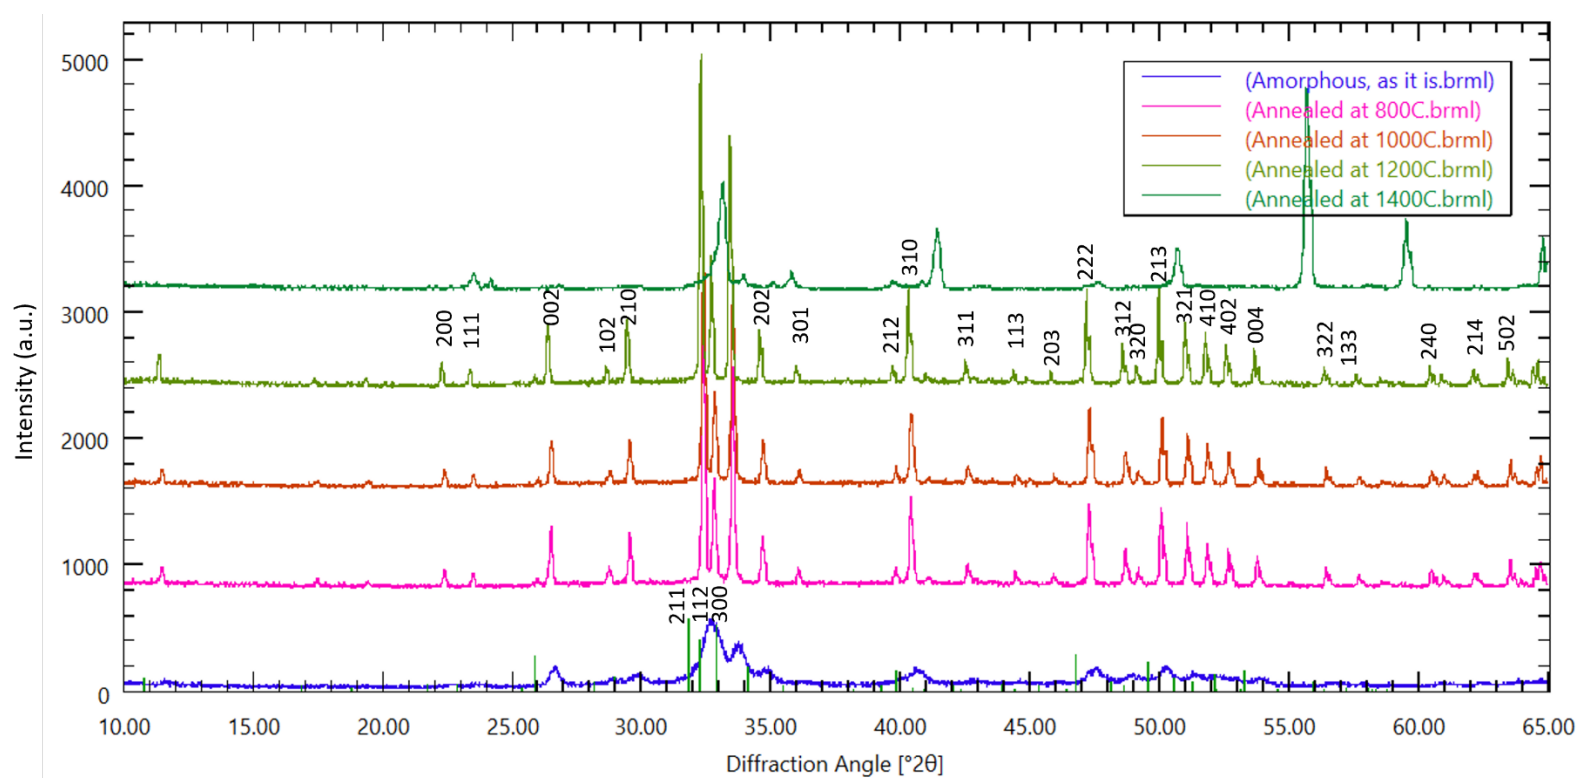

**Figure S3.** XRD patterns of pellets shown in Fig. 1.

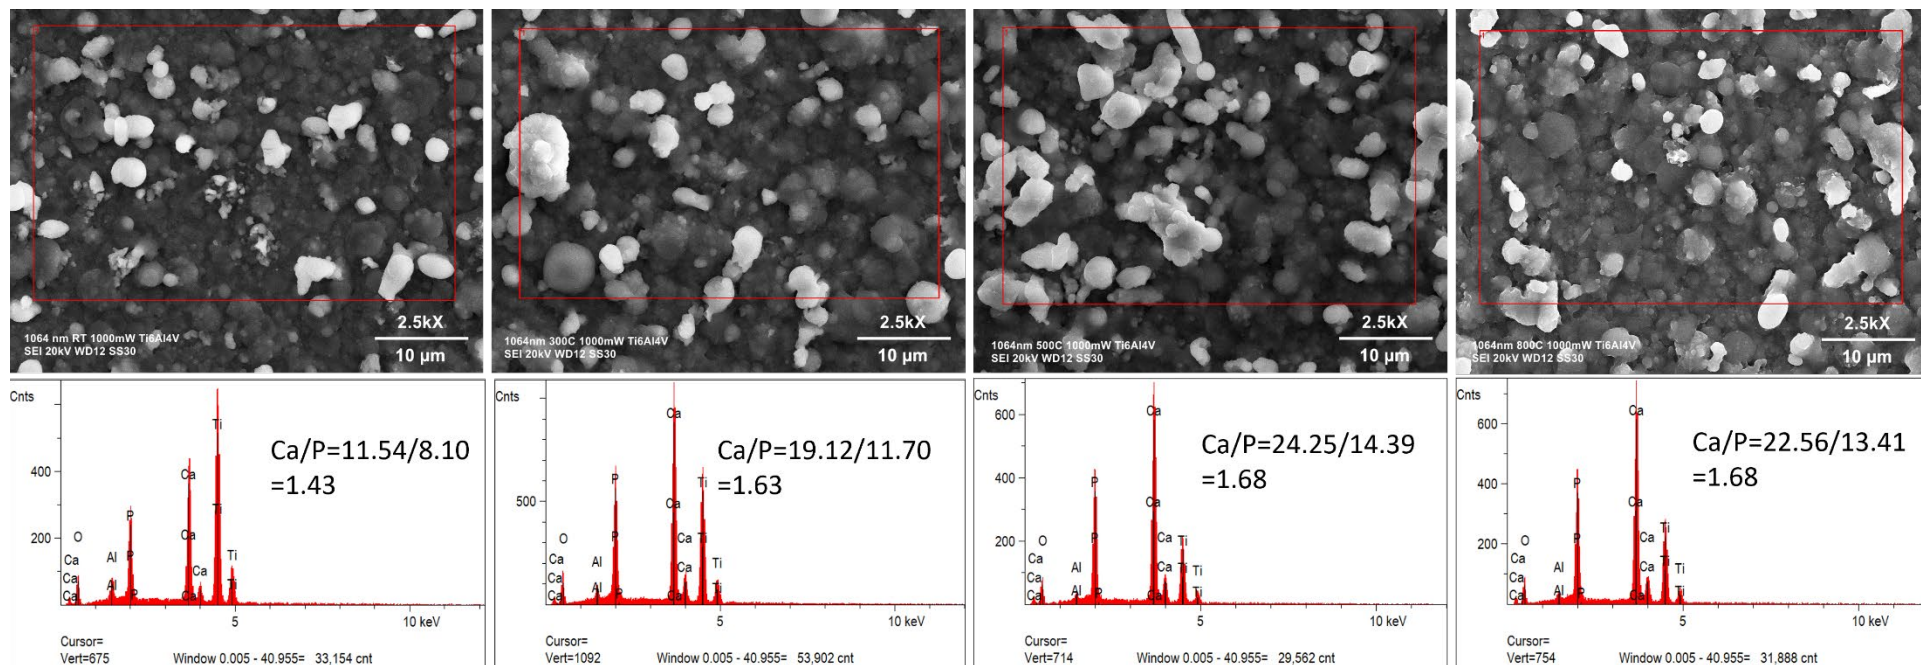

**Figure S3.** 1064 nm deposition, Ca/P ratio study through EDS analysis.



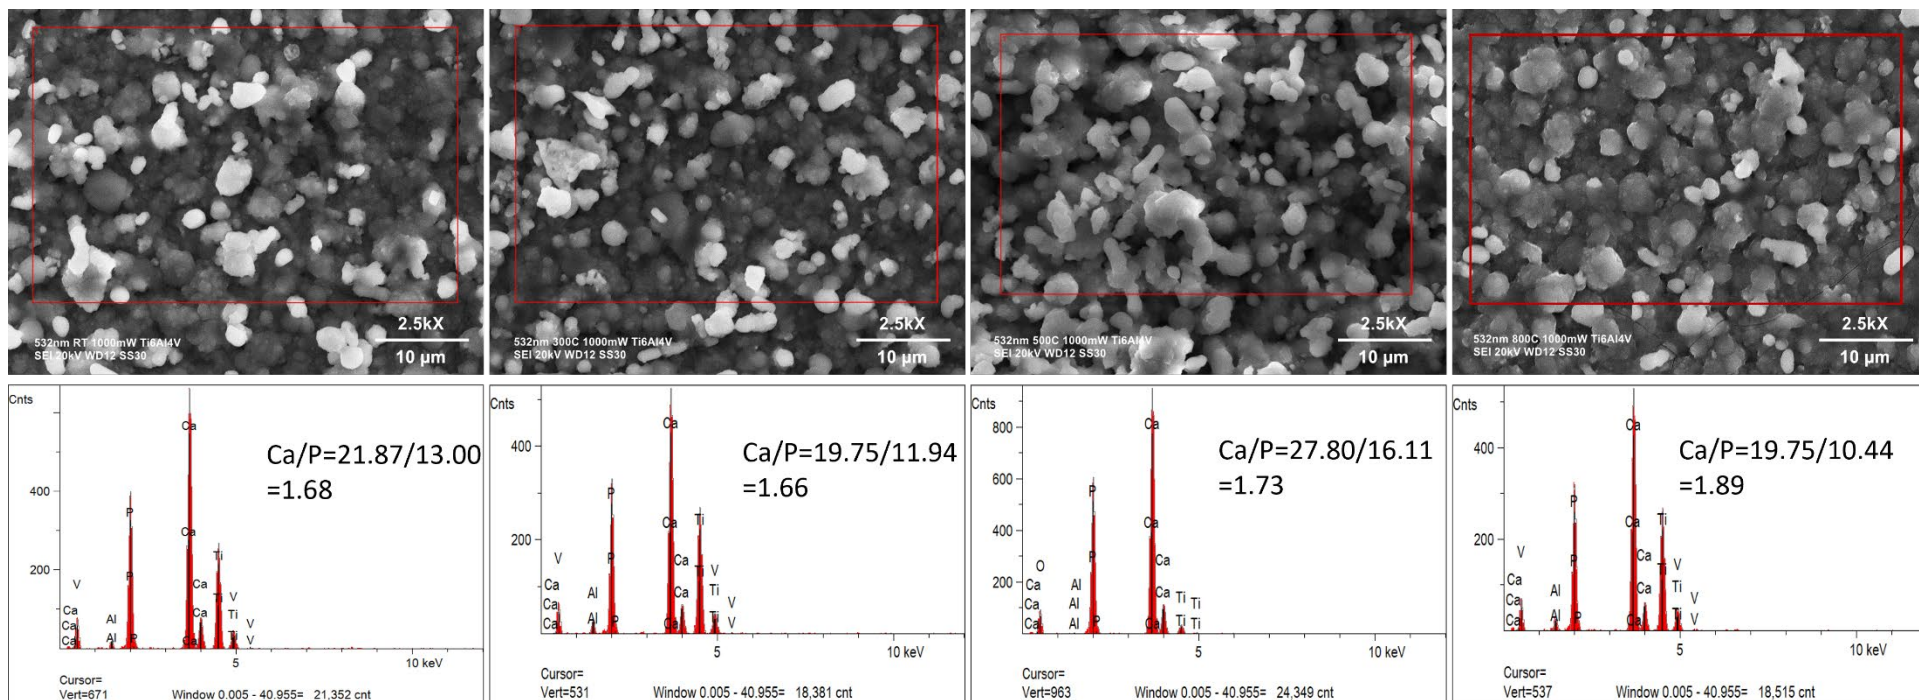

**Figure S4.** 532 nm deposition, Ca/P ratio study through EDS analysis.

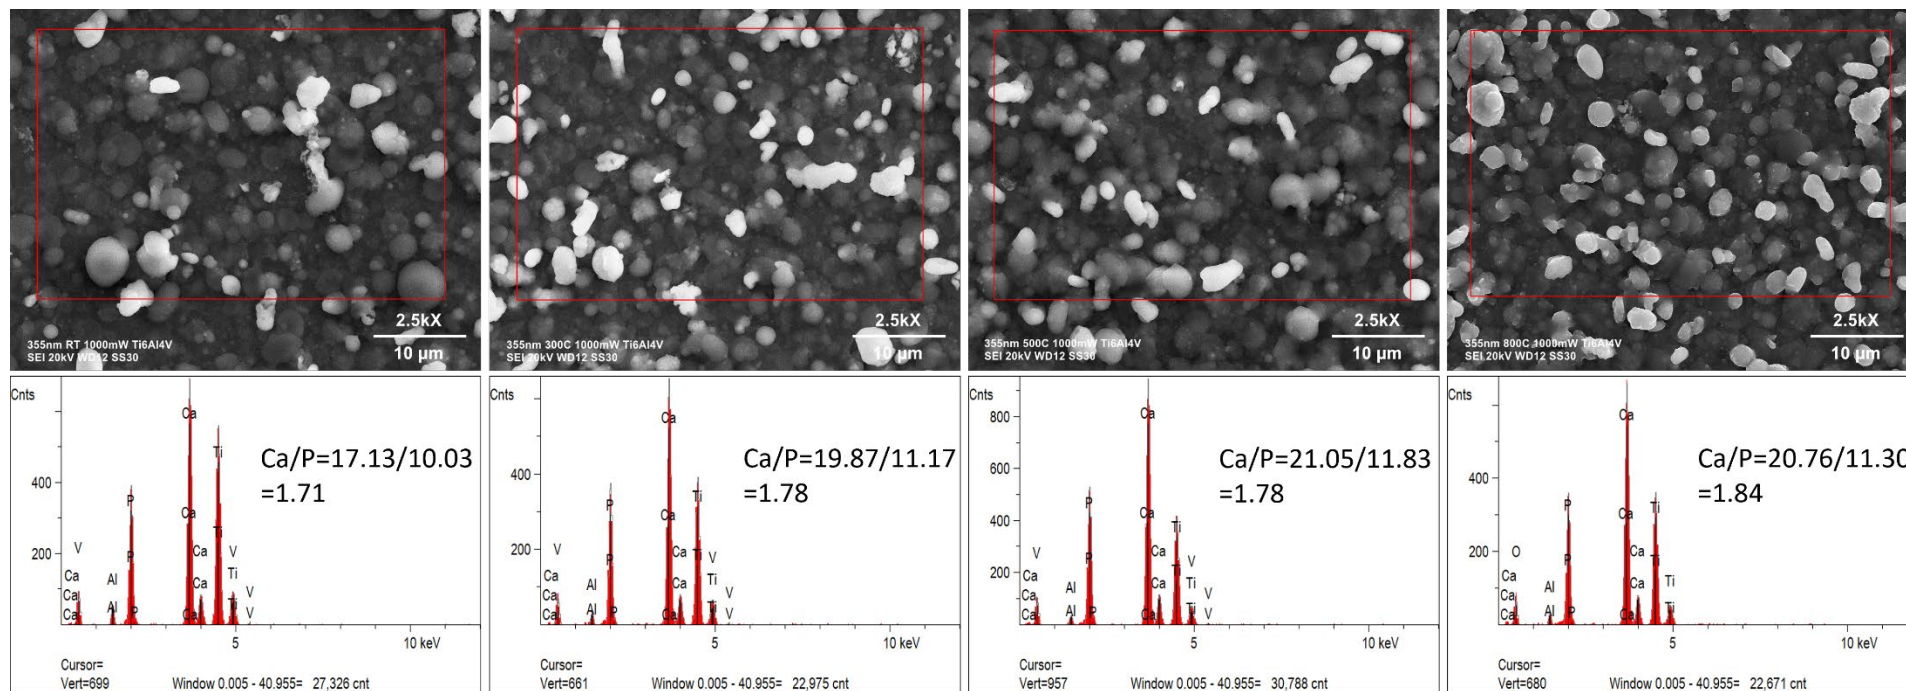

**Figure S5.** 355 nm deposition, Ca/P ratio study through EDS analysis.

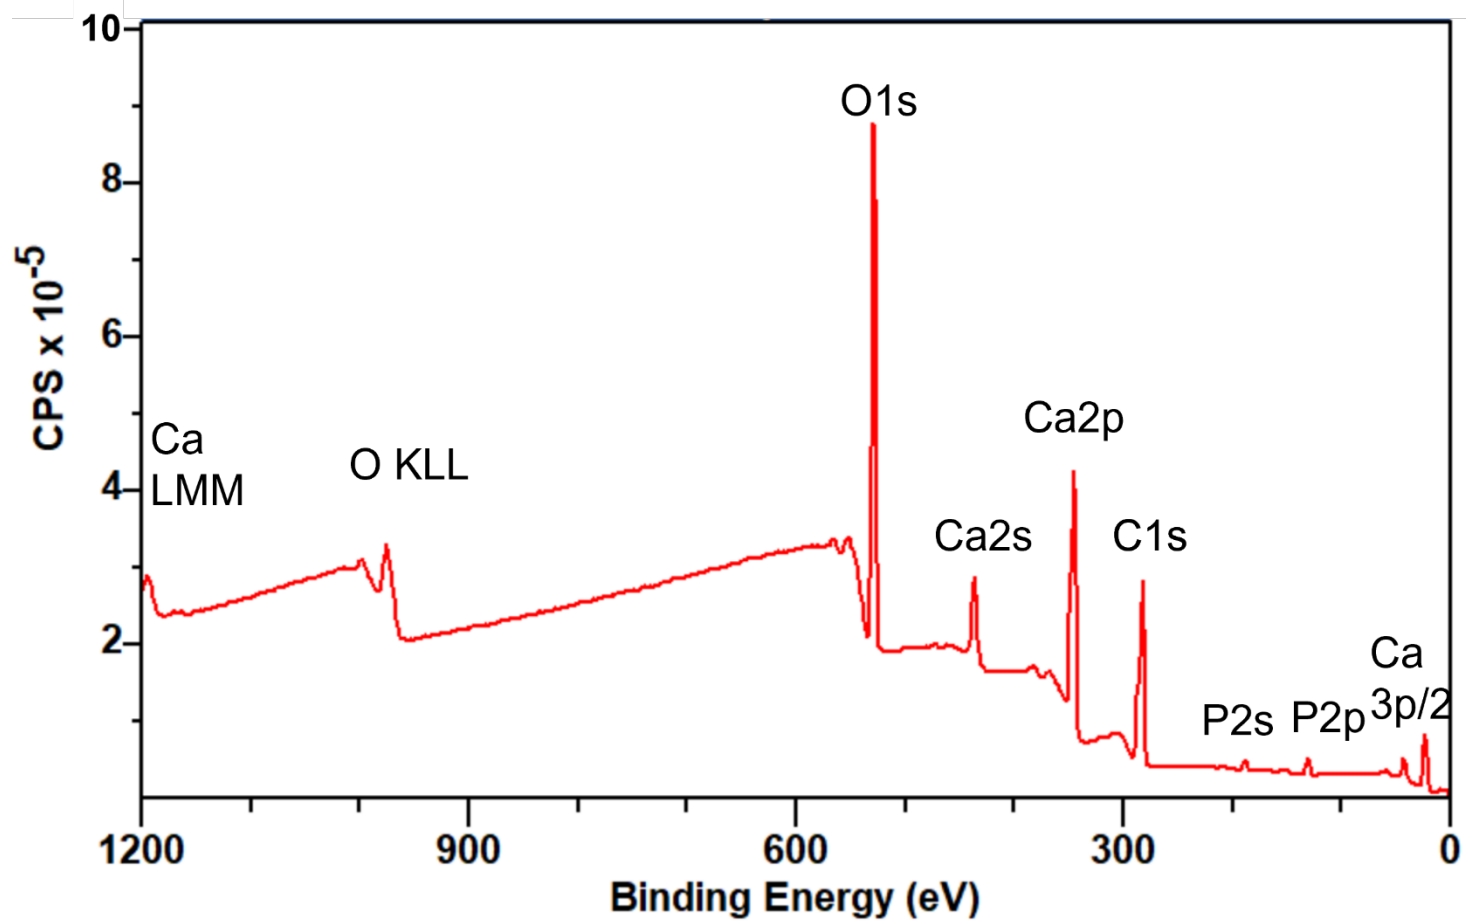

**Figure S6.** XPS of HA coating on Ti6Al4V deposited at 500 °C with 532 nm beam.
